# Supplementary material
Source: Copernicus journal article supplement (doi:10.5194/egusphere-2026-2799)
Supplement: Supplementary file 1 [file egusphere-2026-2799-supplement.pdf]

# Supplement to Estimates of carbonyl sulfide and methane stratospheric lifetimes based on AirCore profiles

5 Alessandro Zanchetta<sup>1</sup>, Steven van Heuven<sup>1</sup>, Rigel Kivi<sup>3</sup>, Michel Ramonet<sup>4</sup>, Andreas Engel<sup>5</sup>, Maarten Krol<sup>6,7</sup>, and Huilin Chen<sup>1,2</sup>

<sup>1</sup> Center for Isotope Research (CIO), Energy and Sustainability Research Institute Groningen (ESRIG), University of Groningen, Groningen, the Netherlands

<sup>2</sup> Joint International Research Laboratory of Atmospheric and Earth System Sciences, School of Atmospheric Sciences, Nanjing University, Nanjing, China

10 <sup>3</sup> Space and Earth Observation Centre, Finnish Meteorological Institute (FMI), Sodankylä, Finland

<sup>4</sup> Laboratoire des Sciences du Climat et l'Environnement (LSCE), CEA - CNRS - UVSQ - University Paris-Saclay, Gif sur Yvette, France

<sup>5</sup> Institute for Atmospheric and Environmental Sciences, University of Frankfurt, Frankfurt, Germany

<sup>6</sup> Meteorology and Air Quality, Wageningen University & Research, Wageningen, the Netherlands

15 <sup>7</sup> Institute for Marine and Atmospheric Research, Utrecht University, Utrecht, the Netherlands

*Correspondence to:* Huilin Chen (huilin.chen@nju.edu.cn, huilin.chen@rug.nl)

## **S1 Data selection process for calculating the slope from COS-N<sub>2</sub>O correlation**

In this section, the data selection process for the COS-N<sub>2</sub>O slope estimation will be presented for all flights except TRN2, which is reported in the main text.

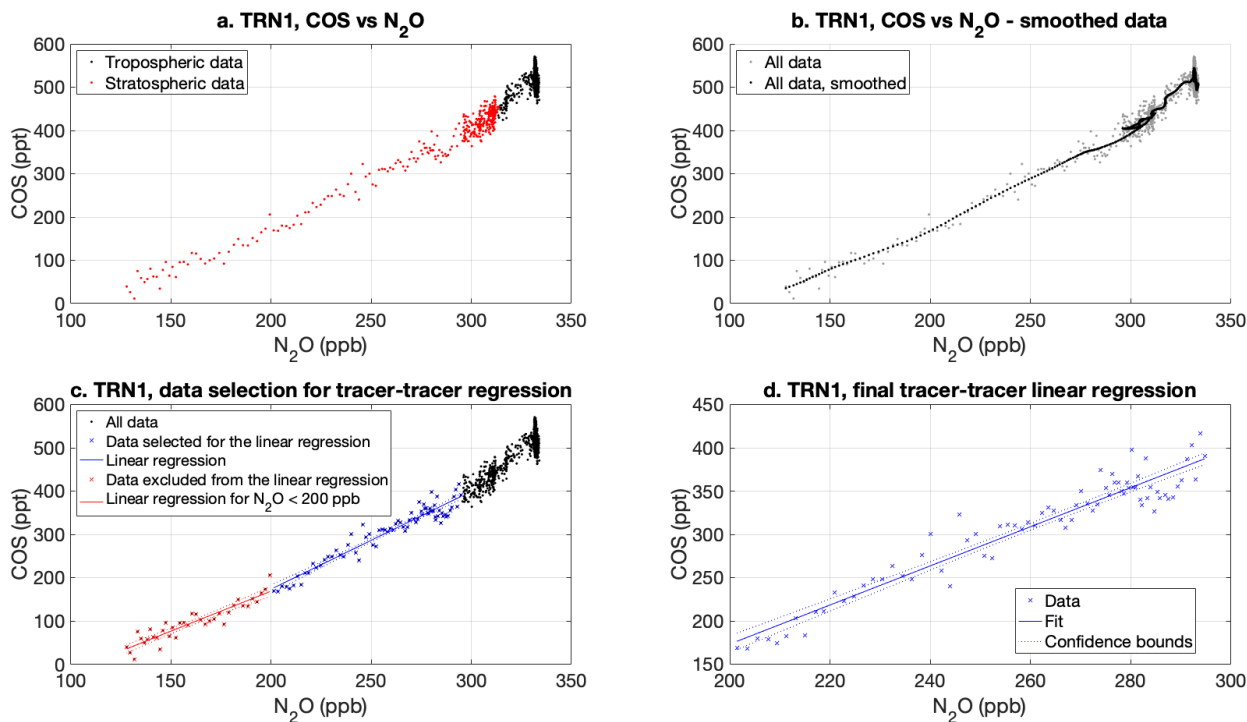

20

Figure S1: data selection steps for the linear regression between COS and  $N_2O$ , TRN1 AirCore data.

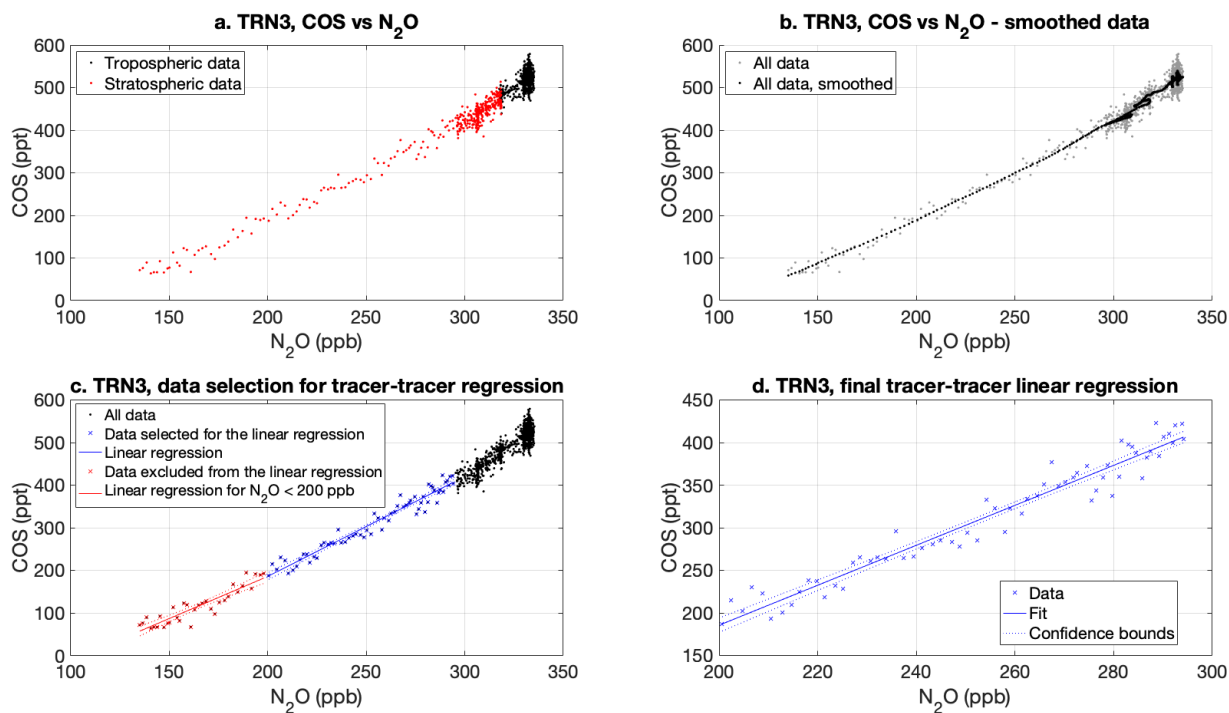

Figure S2: data selection steps for the linear regression between COS and  $N_2O$ , TRN3 AirCore data.

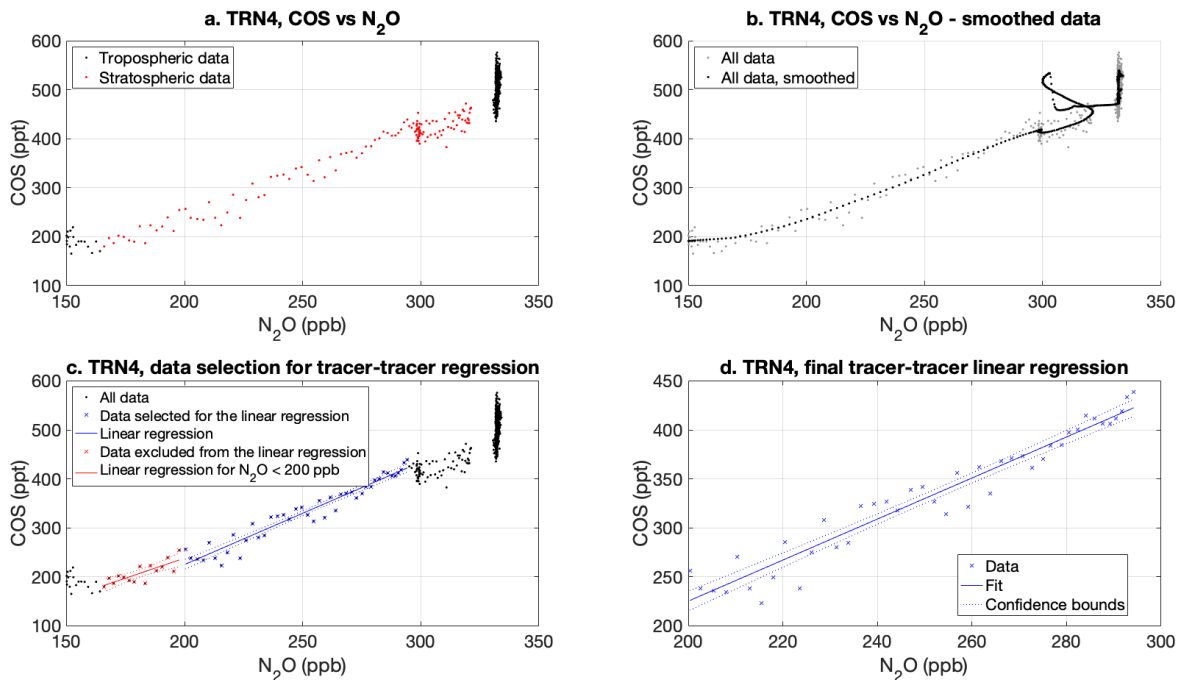

25 **Figure S3: data selection steps for the linear regression between COS and N<sub>2</sub>O, TRN4 AirCore data.**

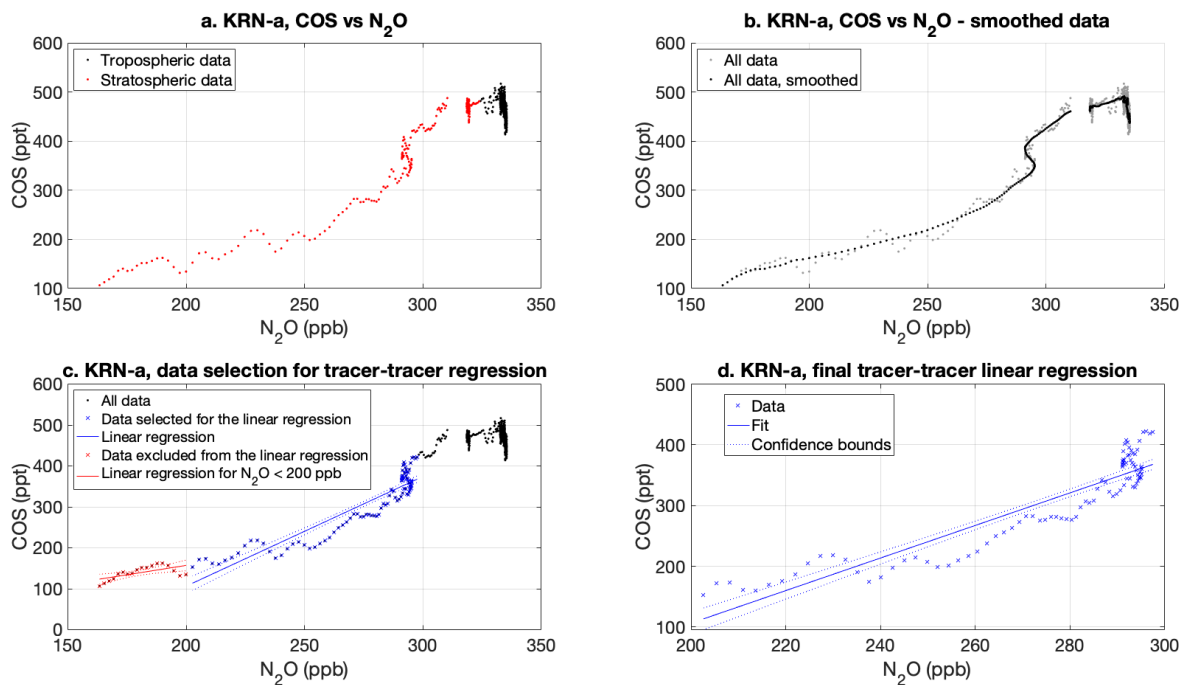

**Figure S4: data selection steps for the linear regression between COS and N<sub>2</sub>O, KRN-a AirCore data.**

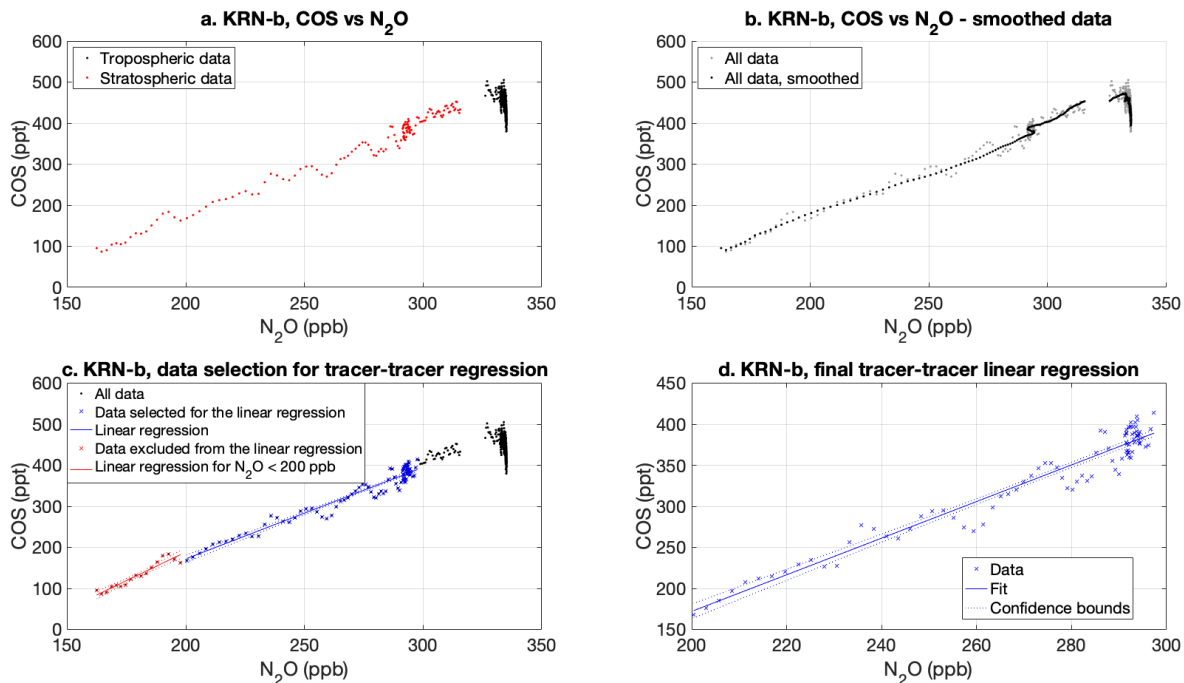

Figure S5: data selection steps for the linear regression between COS and  $N_2O$ , KRN-b AirCore data.

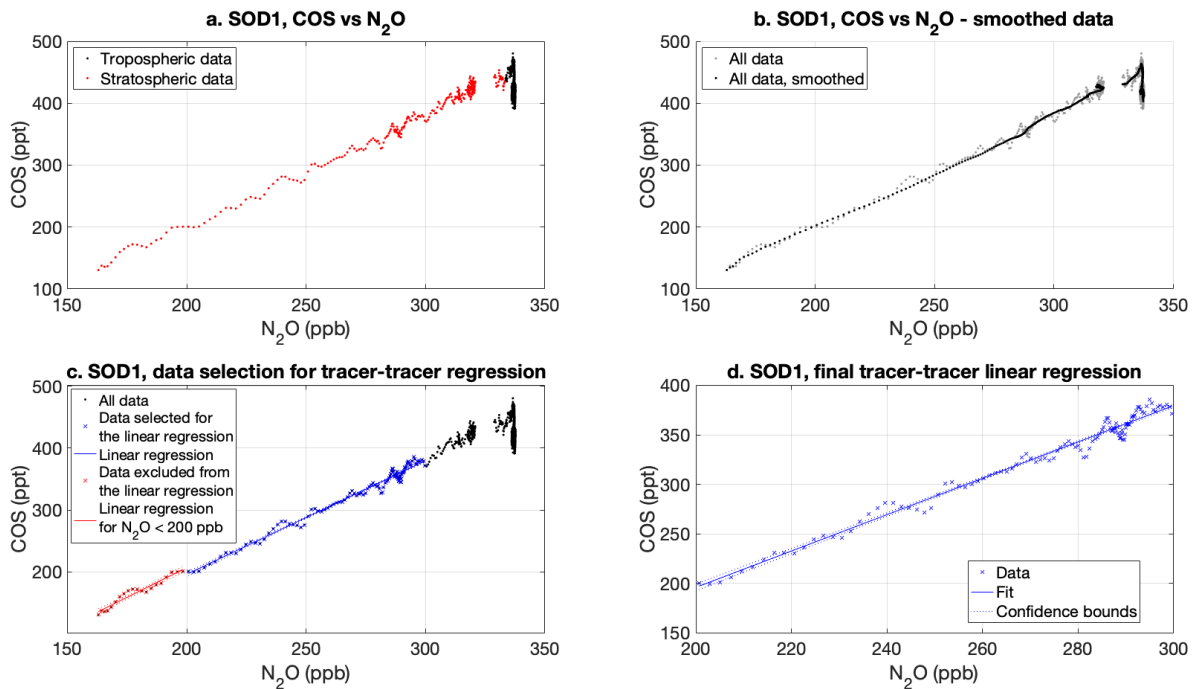

Figure S6: data selection steps for the linear regression between COS and  $N_2O$ , SOD1 AirCore data.

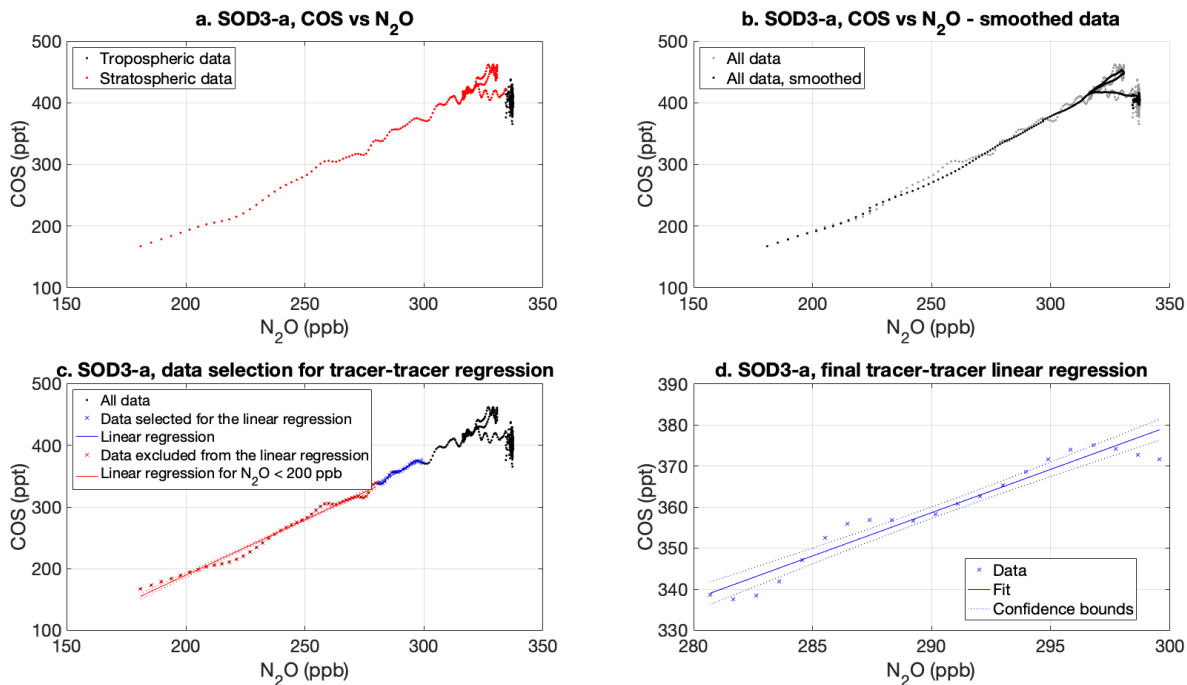

Figure S7: data selection steps for the linear regression between COS and N<sub>2</sub>O, SOD3-a AirCore data.

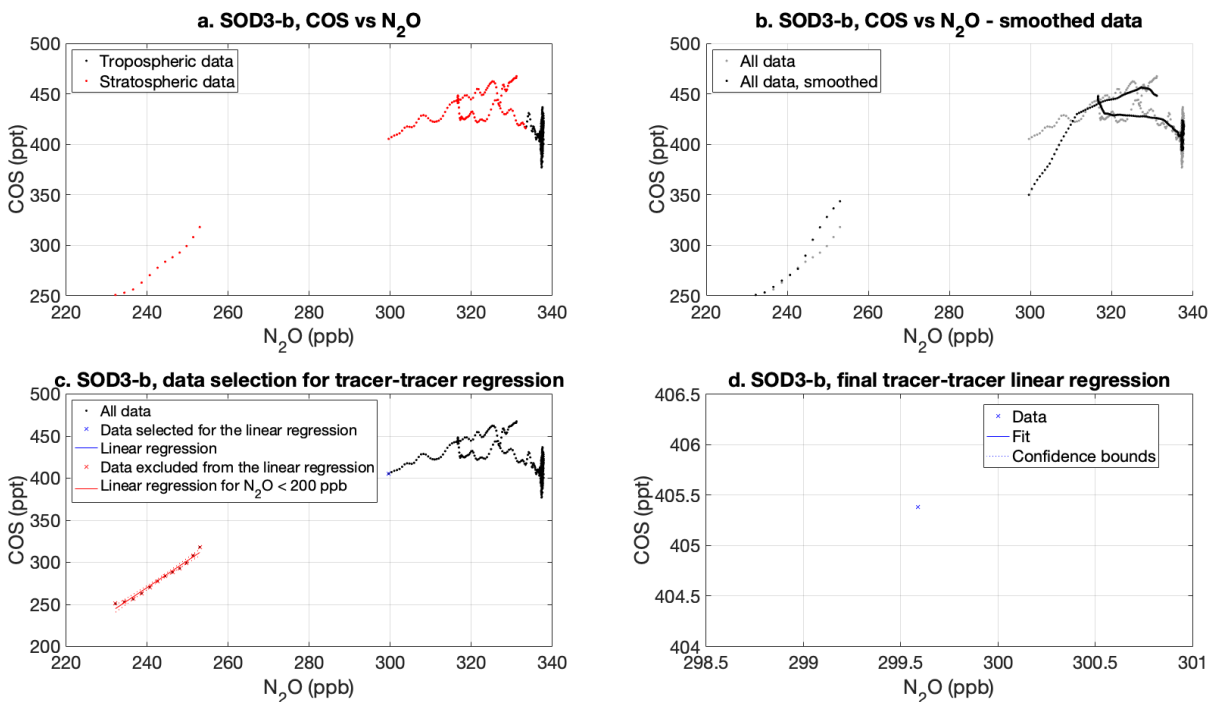

35 Figure S8: data selection steps for the linear regression between COS and N<sub>2</sub>O, SOD3-b AirCore data.

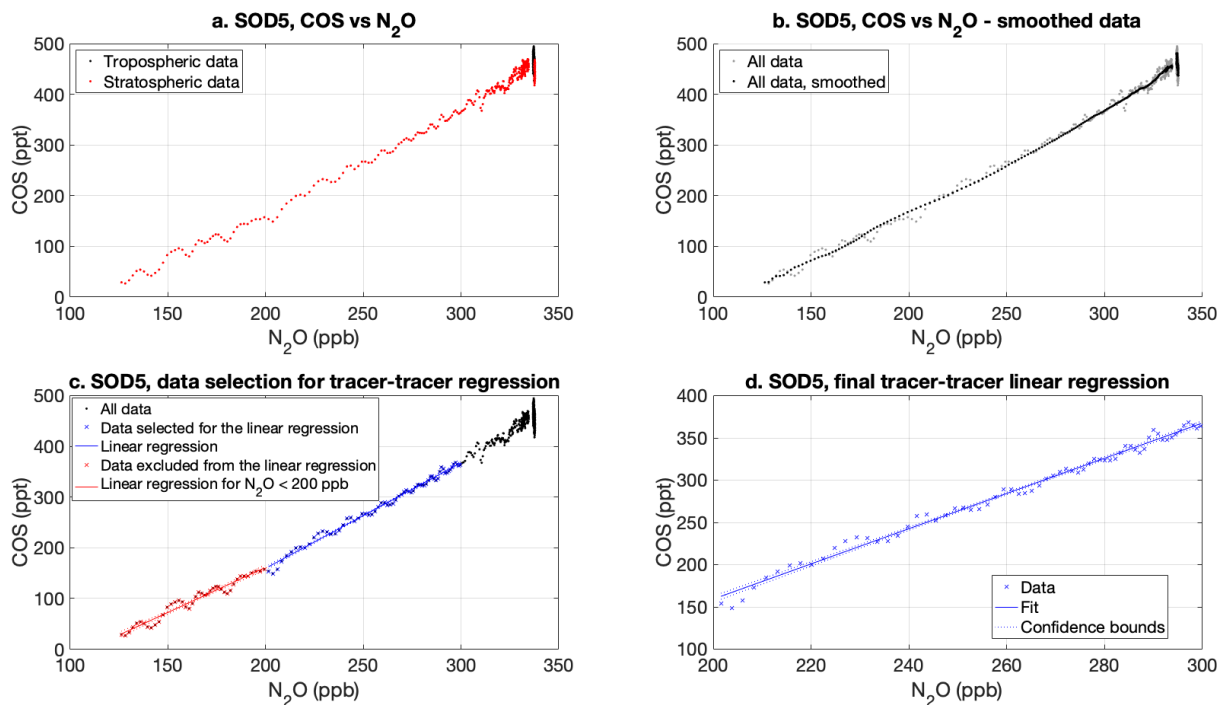

**Figure S9: data selection steps for the linear regression between COS and N<sub>2</sub>O, SOD5 AirCore data.**

## **S2 Data selection process for calculating the slope from CH<sub>4</sub>-N<sub>2</sub>O correlation**

In this section, the data selection process for the CH<sub>4</sub>-N<sub>2</sub>O slope estimation will be presented for all flights except TRN2, which is reported in the main text.

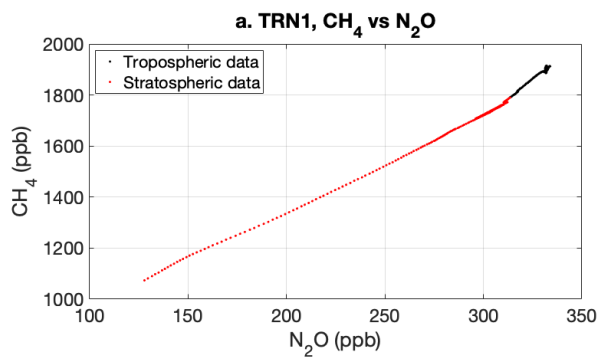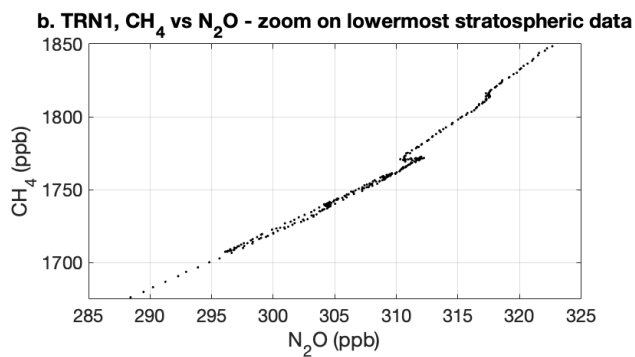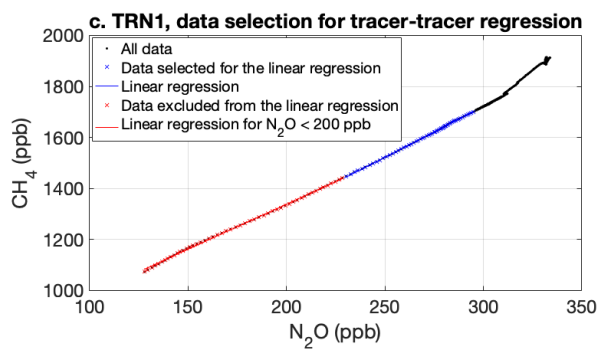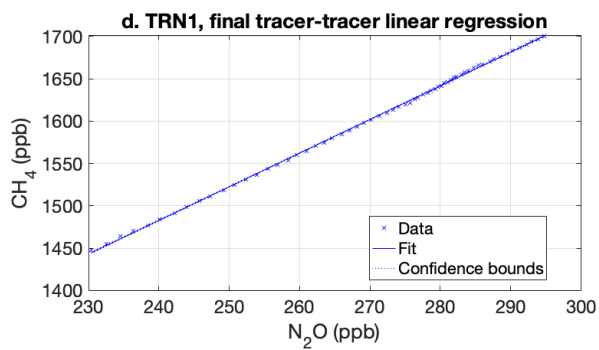

**Figure S10: data selection steps for the linear regression between CH<sub>4</sub> and N<sub>2</sub>O, TRN1 AirCore data.**

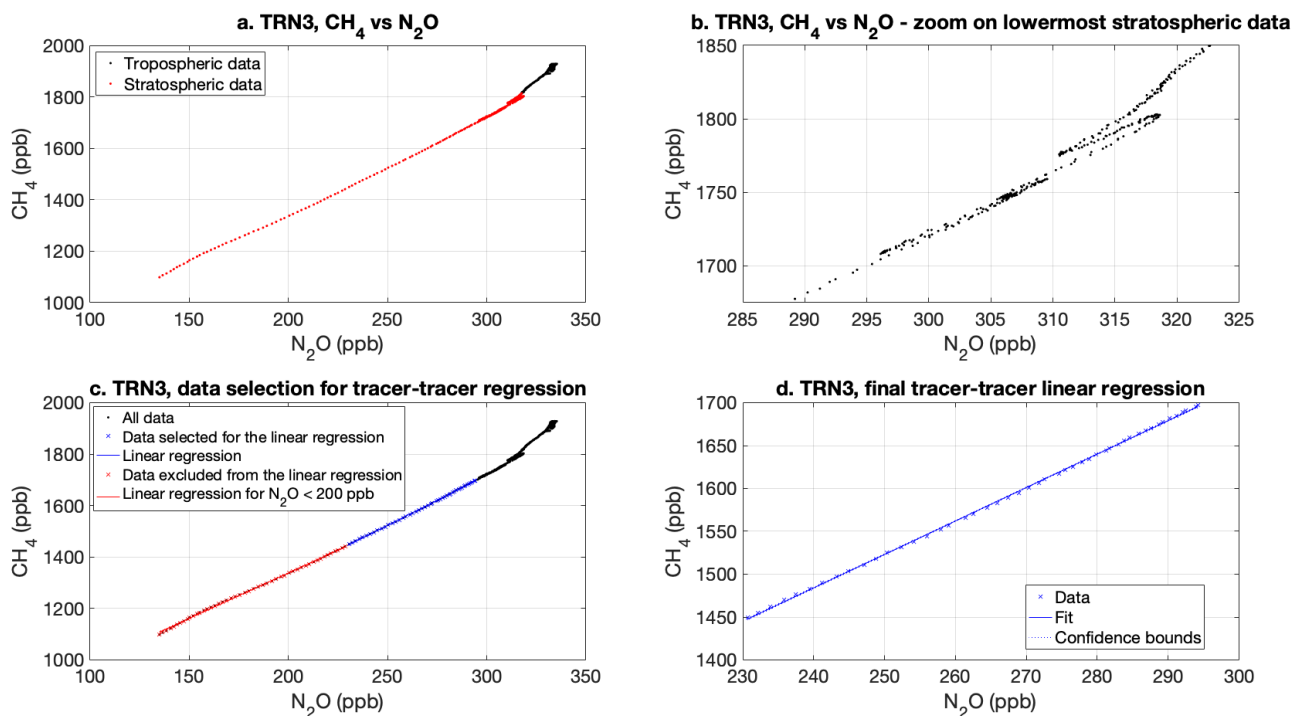

45 **Figure S11: data selection steps for the linear regression between CH<sub>4</sub> and N<sub>2</sub>O, TRN3 AirCore data.**

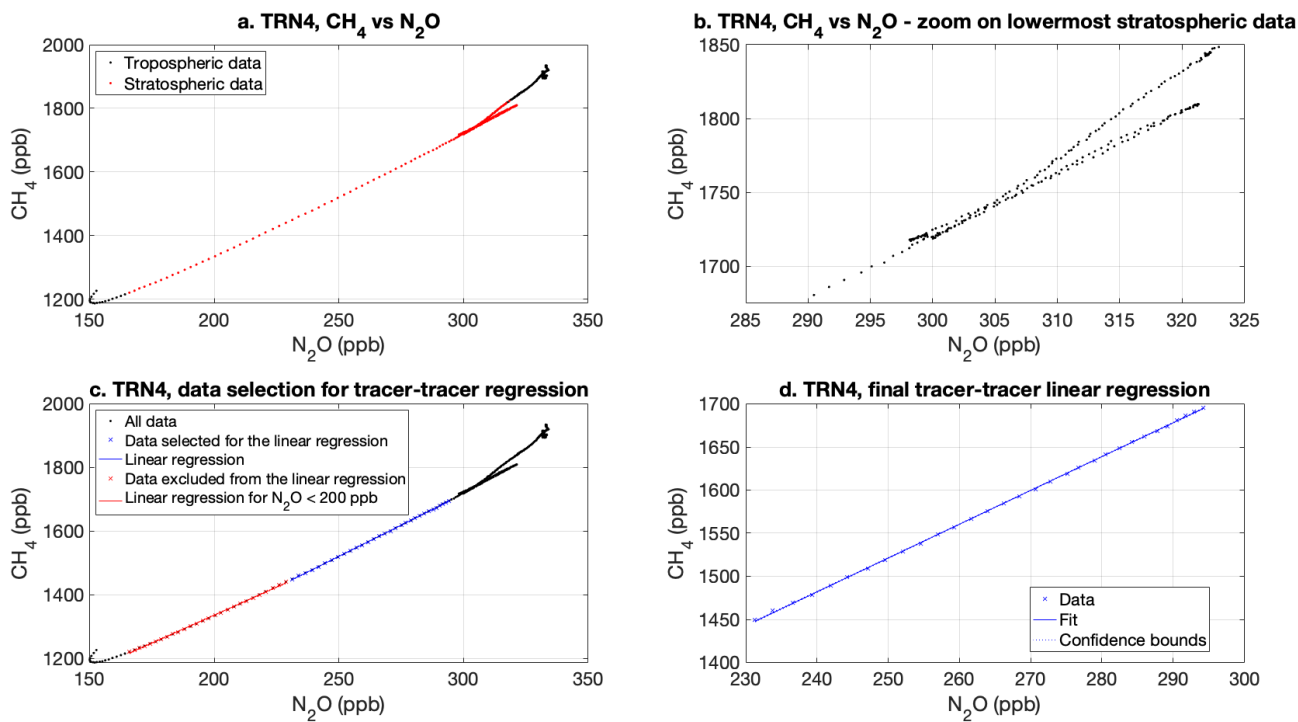

**Figure S12: data selection steps for the linear regression between CH<sub>4</sub> and N<sub>2</sub>O, TRN1 AirCore data.**

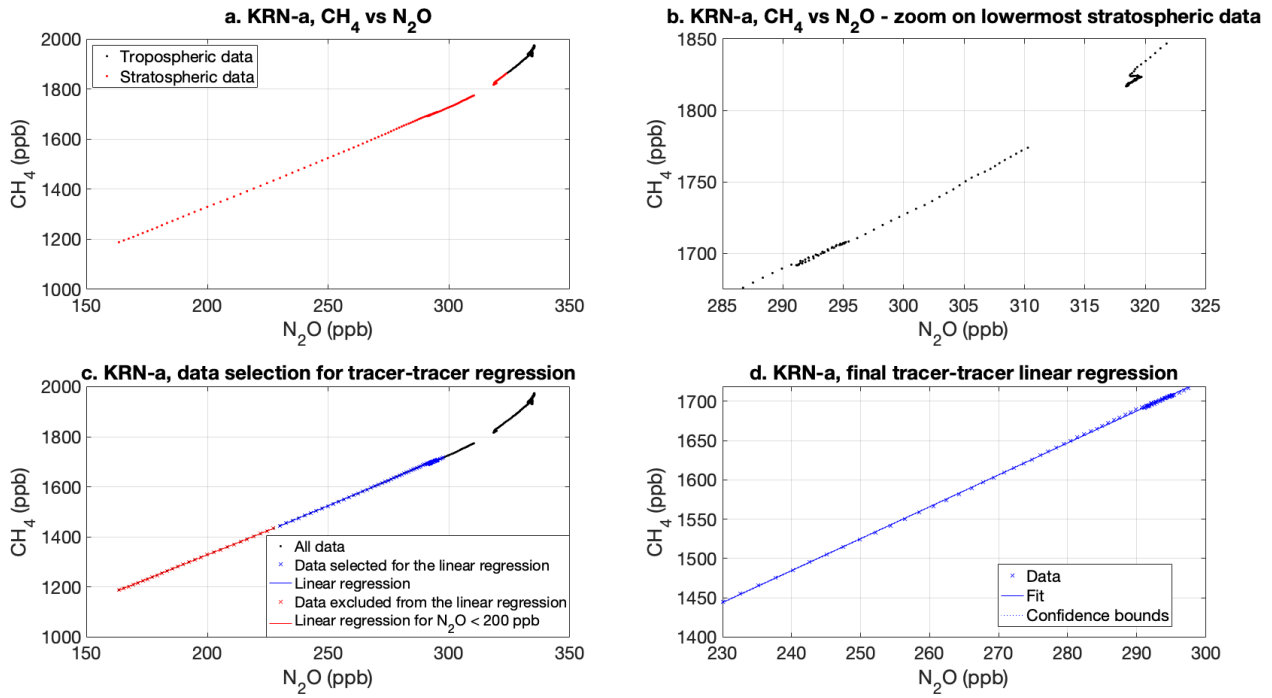

Figure S13: data selection steps for the linear regression between CH<sub>4</sub> and N<sub>2</sub>O, KRN-a AirCore data.

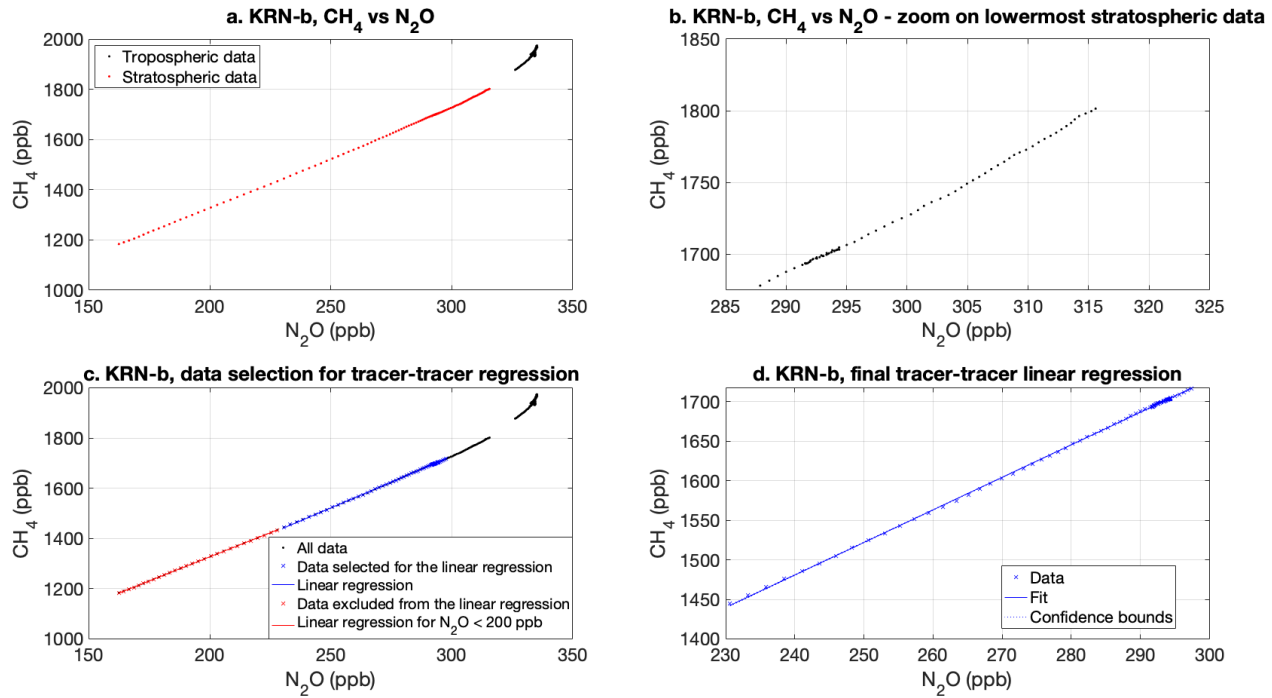

Figure S14: data selection steps for the linear regression between CH<sub>4</sub> and N<sub>2</sub>O, KRN-b AirCore data.

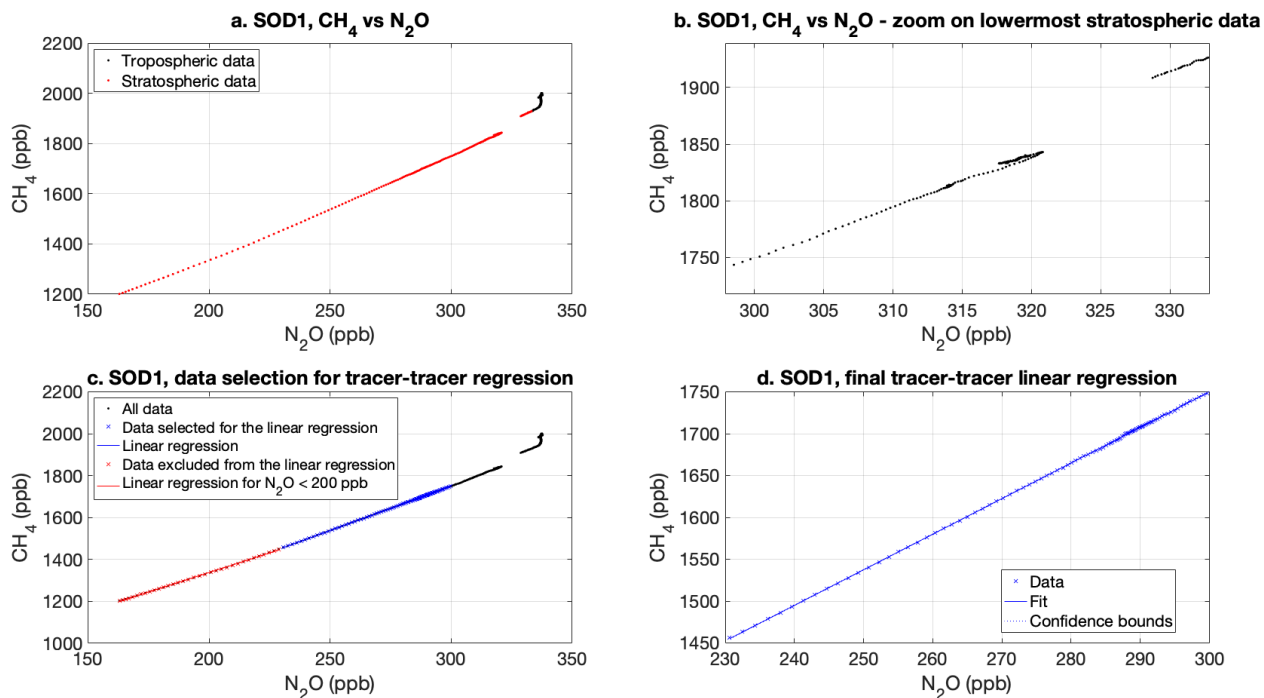

Figure S15: data selection steps for the linear regression between CH<sub>4</sub> and N<sub>2</sub>O, SOD1 AirCore data.

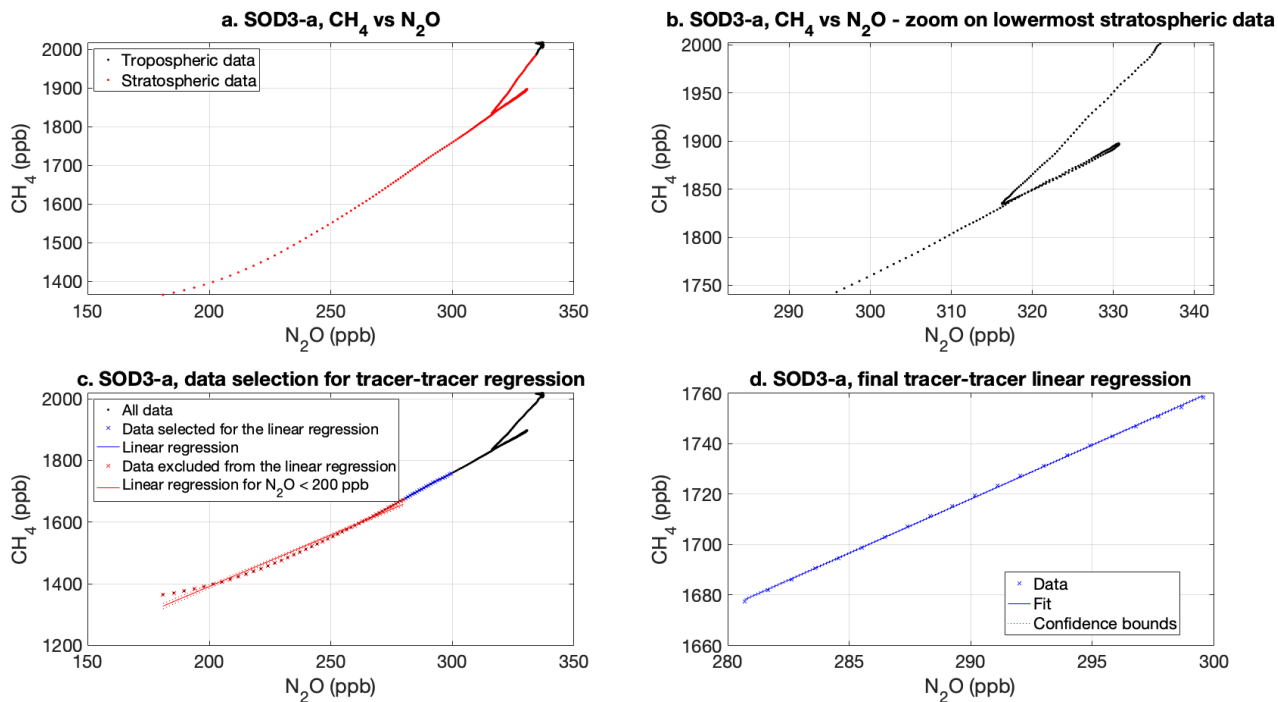

55 Figure S16: data selection steps for the linear regression between CH<sub>4</sub> and N<sub>2</sub>O, SOD3-a AirCore data.

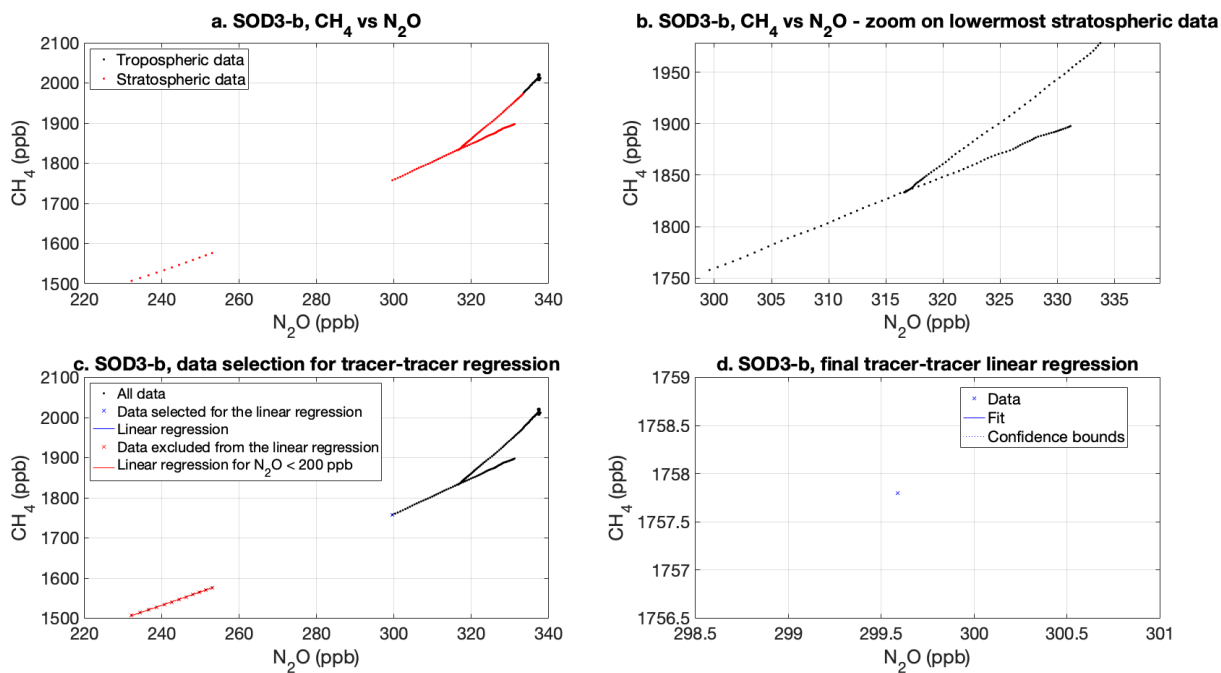

Figure S17: data selection steps for the linear regression between CH<sub>4</sub> and N<sub>2</sub>O, SOD3-b AirCore data.

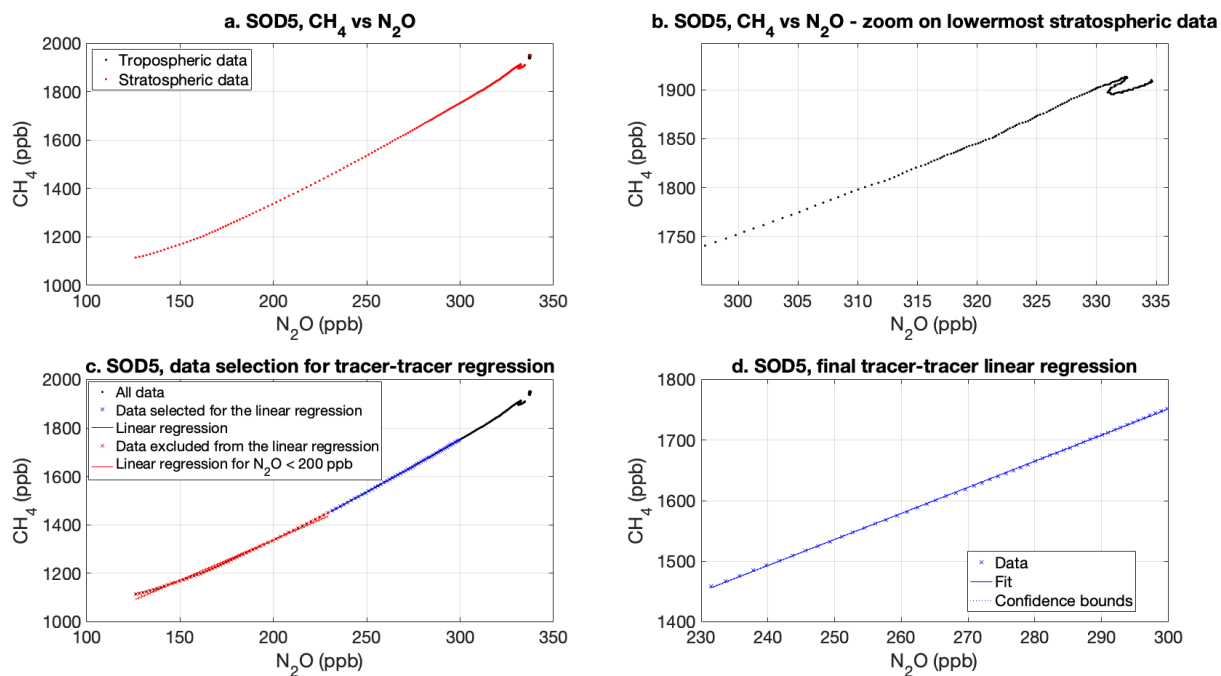

60 Figure S18: data selection steps for the linear regression between CH<sub>4</sub> and N<sub>2</sub>O, SOD5 AirCore data.
